# Supplementary material
Source: publisher figshare collection journal article supplement (https://karger.figshare.com/ndownloader/files/24089618)
Supplement: Supplementary file 1 [file 24089618]

## Sheet: Housekeeping_genes
Supplementary Table S3. Representation of proteins encoded by housekeeping genes
Reference list of proteins encoded by housekeeping genes on the left; after Eisenberg E, Levanon EY. Human housekeeping genes, revisited. Trends Genet. 2013; 29: 569–574.
Ensembl Stable IDs were retrieved for housekeeping genes, employing Ensembl's BioMart mining tool (Ensembl Genes 98).
	SPERM		TESTIS		BODY1		BODY2		LIVER1		LIVER2			Proteins encoded by housekeeping genes (Eisenberg and Levanon, 2013)
	Protein Stable ID		Protein Stable ID		Protein Stable ID		Protein Stable ID		Protein Stable ID		Protein Stable ID			Symbol	Protein Stable ID
Percentage of proteins encoded by housekeeping genes	19.4805		18.1818		15.5844		18.1818		31.1688		23.3766			ACADVL	ENSP00000349297
	ENSP00000200135		ENSP00000222553		ENSP00000250974		ENSP00000005386		ENSP00000000412		ENSP00000170447			PSEN1	ENSP00000326366
	ENSP00000209873		ENSP00000258962		ENSP00000258281		ENSP00000229214		ENSP00000168216		ENSP00000210444			ADSL	ENSP00000485525
	ENSP00000219313		ENSP00000270142		ENSP00000265560		ENSP00000238616		ENSP00000234827		ENSP00000227155			ALAD	ENSP00000386284
	ENSP00000220584		ENSP00000290541		ENSP00000272732		ENSP00000238788		ENSP00000257904		ENSP00000253247			BTD	ENSP00000495254
	ENSP00000226105		ENSP00000295688		ENSP00000296543		ENSP00000262039		ENSP00000258774		ENSP00000259632			CDK4	ENSP00000257904
	ENSP00000249269		ENSP00000296255		ENSP00000296824		ENSP00000264670		ENSP00000264108		ENSP00000261647			CPOX	ENSP00000497326
	ENSP00000252137		ENSP00000299518		ENSP00000316578		ENSP00000266126		ENSP00000264645		ENSP00000263401			CST3	ENSP00000366124
	ENSP00000258091		ENSP00000304467		ENSP00000319169		ENSP00000305524		ENSP00000273920		ENSP00000265560			CSTB	ENSP00000291568
	ENSP00000263897		ENSP00000315925		ENSP00000351422		ENSP00000353735		ENSP00000296473		ENSP00000274849			DDB2	ENSP00000256996
	ENSP00000288937		ENSP00000321259		ENSP00000360464		ENSP00000356134		ENSP00000298694		ENSP00000284503			DLD	ENSP00000205402
	ENSP00000309430		ENSP00000335203		ENSP00000365569		ENSP00000361433		ENSP00000304669		ENSP00000305071			TOR1A	ENSP00000345719
	ENSP00000317159		ENSP00000354947		ENSP00000369895		ENSP00000361536		ENSP00000309432		ENSP00000314067			TAZ	ENSP00000469981
	ENSP00000333666		ENSP00000356425		ENSP00000162749		ENSP00000416658		ENSP00000325612		ENSP00000325312			EMD	ENSP00000358857
	ENSP00000350094		ENSP00000370023		ENSP00000169298		ENSP00000433457		ENSP00000338348		ENSP00000326804			ERCC3	ENSP00000285398
	ENSP00000384273		ENSP00000003084		ENSP00000224237		ENSP00000027335		ENSP00000344223		ENSP00000340243			ERCC5	ENSP00000498881
	ENSP00000160373		ENSP00000005558		ENSP00000230792		ENSP00000217133		ENSP00000347184		ENSP00000408295			ETFA	ENSP00000452762
	ENSP00000222120		ENSP00000157600		ENSP00000238714		ENSP00000217233		ENSP00000348933		ENSP00000452762			FECH	ENSP00000262093
	ENSP00000231061		ENSP00000196371		ENSP00000246802		ENSP00000225941		ENSP00000357869		ENSP00000489189			FH	ENSP00000355518
	ENSP00000238561		ENSP00000211998		ENSP00000252456		ENSP00000228510		ENSP00000387365		ENSP00000074304			FXN	ENSP00000419243
	ENSP00000241041		ENSP00000216254		ENSP00000252854		ENSP00000237654		ENSP00000414558		ENSP00000221466			GAA	ENSP00000305692
	ENSP00000250244		ENSP00000218516		ENSP00000256652		ENSP00000246957		ENSP00000451261		ENSP00000223145			GALT	ENSP00000368119
	ENSP00000253055		ENSP00000220166		ENSP00000258403		ENSP00000258198		ENSP00000458663		ENSP00000232219			GBA	ENSP00000459642
	ENSP00000260187		ENSP00000227251		ENSP00000259748		ENSP00000259089		ENSP00000465894		ENSP00000232978			GBA	ENSP00000357357
	ENSP00000261615		ENSP00000233710		ENSP00000260010		ENSP00000260502		ENSP00000475168		ENSP00000236925			GCDH	ENSP00000222214
	ENSP00000262507		ENSP00000236850		ENSP00000261835		ENSP00000260570		ENSP00000219150		ENSP00000240079			GPI	ENSP00000348877
	ENSP00000263056		ENSP00000242592		ENSP00000261839		ENSP00000262094		ENSP00000231420		ENSP00000253109			GPI	ENSP00000487666
	ENSP00000264708		ENSP00000244061		ENSP00000263468		ENSP00000262213		ENSP00000238561		ENSP00000257566			GSS	ENSP00000498303
	ENSP00000265983		ENSP00000246949		ENSP00000264499		ENSP00000264144		ENSP00000252597		ENSP00000261267			MSH6	ENSP00000234420
	ENSP00000266682		ENSP00000260129		ENSP00000265465		ENSP00000264711		ENSP00000253382		ENSP00000261514			HADHA	ENSP00000370023
	ENSP00000274376		ENSP00000261254		ENSP00000267064		ENSP00000264867		ENSP00000254770		ENSP00000261590			HMBS	ENSP00000498786
	ENSP00000286800		ENSP00000261733		ENSP00000269391		ENSP00000265036		ENSP00000261366		ENSP00000263686			HPS1	ENSP00000355310
	ENSP00000287295		ENSP00000263579		ENSP00000272519		ENSP00000300026		ENSP00000261889		ENSP00000266581			MEN1	ENSP00000377899
	ENSP00000290216		ENSP00000265983		ENSP00000274498		ENSP00000300417		ENSP00000262715		ENSP00000268058			MLH1	ENSP00000231790
	ENSP00000303058		ENSP00000273398		ENSP00000280362		ENSP00000300571		ENSP00000265381		ENSP00000271064			MTM1	ENSP00000359423
	ENSP00000304891		ENSP00000276449		ENSP00000295934		ENSP00000300650		ENSP00000265404		ENSP00000272519			MMUT	ENSP00000274813
	ENSP00000304895		ENSP00000276914		ENSP00000297265		ENSP00000303252		ENSP00000265990		ENSP00000273588			NF2	ENSP00000344666
	ENSP00000309132		ENSP00000287936		ENSP00000300108		ENSP00000308549		ENSP00000272322		ENSP00000279227			NPC1	ENSP00000269228
	ENSP00000317000		ENSP00000291565		ENSP00000302276		ENSP00000308576		ENSP00000284240		ENSP00000280734			OAT	ENSP00000357838
	ENSP00000321584		ENSP00000295834		ENSP00000304108		ENSP00000314420		ENSP00000288602		ENSP00000289004			PEPD	ENSP00000244137
	ENSP00000332118		ENSP00000295897		ENSP00000306561		ENSP00000318472		ENSP00000294309		ENSP00000311427			PEX12	ENSP00000225873
	ENSP00000333024		ENSP00000301455		ENSP00000306968		ENSP00000323183		ENSP00000300134		ENSP00000314556			PEX6	ENSP00000303511
	ENSP00000340093		ENSP00000302100		ENSP00000307046		ENSP00000325526		ENSP00000301149		ENSP00000316032			PGK1	ENSP00000362413
	ENSP00000342121		ENSP00000308938		ENSP00000307607		ENSP00000340874		ENSP00000311300		ENSP00000318176			PHKB	ENSP00000313504
	ENSP00000342262		ENSP00000310688		ENSP00000308944		ENSP00000348043		ENSP00000318177		ENSP00000322730			PLOD1	ENSP00000196061
	ENSP00000342793		ENSP00000311113		ENSP00000309576		ENSP00000355927		ENSP00000328524		ENSP00000329357			CTSA	ENSP00000361562
	ENSP00000344668		ENSP00000317997		ENSP00000310036		ENSP00000356218		ENSP00000331897		ENSP00000333900			PTEN	ENSP00000361021
	ENSP00000345917		ENSP00000319308		ENSP00000310406		ENSP00000356832		ENSP00000346478		ENSP00000339958			PTEN	ENSP00000495622
	ENSP00000347161		ENSP00000325527		ENSP00000312286		ENSP00000358770		ENSP00000347532		ENSP00000343706			PEX2	ENSP00000349543
	ENSP00000347792		ENSP00000327070		ENSP00000313983		ENSP00000360998		ENSP00000348010		ENSP00000345728			PEX5	ENSP00000266564
	ENSP00000348471		ENSP00000331897		ENSP00000315410		ENSP00000364475		ENSP00000350676		ENSP00000347464			TPI1	ENSP00000379933
	ENSP00000349244		ENSP00000333821		ENSP00000315602		ENSP00000369150		ENSP00000351159		ENSP00000350934			UROD	ENSP00000246337
	ENSP00000351717		ENSP00000337853		ENSP00000320176		ENSP00000369979		ENSP00000355541		ENSP00000351052			UROS	ENSP00000357787
	ENSP00000352408		ENSP00000338072		ENSP00000322915		ENSP00000373340		ENSP00000357175		ENSP00000351740			XPA	ENSP00000364270
	ENSP00000355237		ENSP00000341117		ENSP00000327025		ENSP00000374219		ENSP00000361264		ENSP00000356481			ALDH3A2	ENSP00000176643
	ENSP00000357922		ENSP00000345230		ENSP00000329735		ENSP00000374443		ENSP00000361285		ENSP00000357065			BLMH	ENSP00000261714
	ENSP00000358045		ENSP00000346032		ENSP00000330523		ENSP00000375892		ENSP00000361900		ENSP00000360916			CYB5R3	ENSP00000338461
	ENSP00000359799		ENSP00000346901		ENSP00000332716		ENSP00000377547		ENSP00000363161		ENSP00000362010			ERCC2	ENSP00000375809
	ENSP00000359925		ENSP00000351410		ENSP00000337998		ENSP00000378324		ENSP00000365220		ENSP00000362170			HSD17B4	ENSP00000424940
	ENSP00000360286		ENSP00000352272		ENSP00000338352		ENSP00000380247		ENSP00000366271		ENSP00000363516			IFNGR1	ENSP00000356713
	ENSP00000362590		ENSP00000353224		ENSP00000343463		ENSP00000381237		ENSP00000366395		ENSP00000363603			PAFAH1B1	ENSP00000380378
	ENSP00000364133		ENSP00000354837		ENSP00000343785		ENSP00000381970		ENSP00000367123		ENSP00000363921			NEU1	ENSP00000409489
	ENSP00000367721		ENSP00000356771		ENSP00000346508		ENSP00000382791		ENSP00000369411		ENSP00000365227			NEU1	ENSP00000229725
	ENSP00000370839		ENSP00000357066		ENSP00000352561		ENSP00000385083		ENSP00000370695		ENSP00000370337			NEU1	ENSP00000408207
	ENSP00000377390		ENSP00000357283		ENSP00000352841		ENSP00000386076		ENSP00000372201		ENSP00000379601			NEU1	ENSP00000364782
	ENSP00000381425		ENSP00000359976		ENSP00000353679		ENSP00000389934		ENSP00000376071		ENSP00000380271			NEU1	ENSP00000408957
	ENSP00000393183		ENSP00000360290		ENSP00000354900		ENSP00000393557		ENSP00000376436		ENSP00000383986			NEU1	ENSP00000403720
	ENSP00000394405		ENSP00000361666		ENSP00000354911		ENSP00000397181		ENSP00000377148		ENSP00000386636			NEU1	ENSP00000401067
	ENSP00000398688		ENSP00000366244		ENSP00000355938		ENSP00000398350		ENSP00000378405		ENSP00000387261			NEU1	ENSP00000399309
	ENSP00000402584		ENSP00000377303		ENSP00000360107		ENSP00000398495		ENSP00000384222		ENSP00000390849			PSEN2	ENSP00000355747
	ENSP00000402608		ENSP00000377833		ENSP00000362590		ENSP00000399718		ENSP00000391596		ENSP00000395738			SOD1	ENSP00000270142
	ENSP00000406012		ENSP00000379895		ENSP00000372361		ENSP00000404676		ENSP00000401191		ENSP00000406191			STK11	ENSP00000324856
	ENSP00000415430		ENSP00000384708		ENSP00000376204		ENSP00000415481		ENSP00000419665		ENSP00000411012			UBE3A	ENSP00000497594
	ENSP00000417653		ENSP00000414303		ENSP00000378735		ENSP00000438590		ENSP00000430684		ENSP00000414237			PEX1	ENSP00000248633
	ENSP00000420854		ENSP00000419027		ENSP00000382508		ENSP00000440207		ENSP00000438689		ENSP00000450436			GALNS	ENSP00000268695
	ENSP00000435466		ENSP00000430269		ENSP00000425133		ENSP00000275732		ENSP00000451211		ENSP00000451752			HEXA	ENSP00000268097
	ENSP00000438262		ENSP00000445175		ENSP00000432768		ENSP00000216923		ENSP00000452181		ENSP00000470298			SMPD1	ENSP00000340409
	ENSP00000473172		ENSP00000463999		ENSP00000440704		ENSP00000246785		ENSP00000476145		ENSP00000479919			TSC2	ENSP00000219476
														IFNAR1	ENSP00000270139
														GSR	ENSP00000221130
														ADH5	ENSP00000296412
														AHCY	ENSP00000217426
														ALDH9A1	ENSP00000346827
														BCKDHA	ENSP00000269980
														COMT	ENSP00000354511
														GART	ENSP00000459532
														GART	ENSP00000371236
														GRINA	ENSP00000314380
														GSTM4	ENSP00000358851
														GUK1	ENSP00000317659
														NQO2	ENSP00000369822
														PDHB	ENSP00000307241
														POLR2A	ENSP00000499521
														POLR2A	ENSP00000494840
														POLR2B	ENSP00000312735
														RPL4	ENSP00000311430
														RPL6	ENSP00000202773
														RPL8	ENSP00000378378
														RPL11	ENSP00000496250
														RPL27	ENSP00000253788
														RPL30	ENSP00000287038
														RPL31	ENSP00000264258
														RPL32	ENSP00000416429
														RPL34	ENSP00000378162
														RPL35A	ENSP00000495672
														RPL36AL	ENSP00000346012
														REEP3	ENSP00000362863
														TSR3	ENSP00000007390
														TIMM50	ENSP00000475531
														ALKBH2	ENSP00000343021
														ETFRF1	ENSP00000370761
														MED11	ENSP00000293777
														C4orf3	ENSP00000485697
														TOMM5	ENSP00000313584
														C8orf82	ENSP00000436621
														ECHDC1	ENSP00000401751
														ZNF787	ENSP00000478557
														PTRH1	ENSP00000439469
														HMGXB4	ENSP00000216106
														ALG11	ENSP00000430236
														ZNF740	ENSP00000409463
														RNASEK	ENSP00000449500
														YPEL2	ENSP00000312272
														JMJD8	ENSP00000477481
														SDCBP	ENSP00000395351
														SCP2	ENSP00000386214
														IRGQ	ENSP00000387535
														COA5	ENSP00000330730
														TTC32	ENSP00000333018
														CISD2	ENSP00000273986
														LAMTOR4	ENSP00000343118
														TMEM64	ENSP00000414786
														ZNF121	ENSP00000326967
														C6orf226	ENSP00000386146
														STK16	ENSP00000386928
														RPS5	ENSP00000196551
														PPP2CB	ENSP00000221138
														C12orf29	ENSP00000349358
														FAM168B	ENSP00000374565
														RPS6	ENSP00000369757
														TTC7B	ENSP00000336127
														RNF187	ENSP00000306396
														RNF187	ENSP00000495836
														IBA57	ENSP00000355672
														MYPOP	ENSP00000325402
														CTU2	ENSP00000388320
														COA6	ENSP00000355572
														UBE2NL	ENSP00000488314
														GDPGP1	ENSP00000452793
														PTRHD1	ENSP00000330389
														SRRD	ENSP00000215917
														EIF2AK4	ENSP00000263791
														CXorf40B	ENSP00000359434
														RPS13	ENSP00000435777
														TMCC1	ENSP00000376930
														C14orf28	ENSP00000326846
														C2orf76	ENSP00000386302
														VMA21	ENSP00000333255
														CMC4	ENSP00000358496
														SERF2	ENSP00000249786
														NME1-NME2	ENSP00000376889
														LRRC24	ENSP00000434849
														RPS23	ENSP00000296674
														ANO6	ENSP00000320087
														RPS24	ENSP00000478869
														KCTD21	ENSP00000339340
														C6orf120	ENSP00000346931
														CPTP	ENSP00000343890
														ZNF181	ENSP00000420727
														COX19	ENSP00000342015
														SRSF7	ENSP00000325905
														PLAA	ENSP00000380460
														ELP6	ENSP00000296149
														MCUR1	ENSP00000368468
														DDX59	ENSP00000330460
														TMPO	ENSP00000376773
														MICOS10	ENSP00000325562
														RRM1	ENSP00000300738
														RPAIN	ENSP00000370606
														NGRN	ENSP00000368389
														ACOT9	ENSP00000336580
														ITPRIPL2	ENSP00000370849
														C18orf32	ENSP00000323199
														SRA1	ENSP00000337513
														BOLA3	ENSP00000295326
														NPRL3	ENSP00000382834
														USP9X	ENSP00000316357
														IAH1	ENSP00000417580
														CREBZF	ENSP00000433459
														SNAPC3	ENSP00000370200
														COA3	ENSP00000354762
														YARS2	ENSP00000320658
														ASB1	ENSP00000264607
														LINS1	ENSP00000318423
														PPAN-P2RY11	ENSP00000377385
														UEVLD	ENSP00000379500
														PGP	ENSP00000330918
														PSPC1	ENSP00000481916
														PIGY	ENSP00000432688
														ZSWIM7	ENSP00000382218
														MSMP	ENSP00000419194
														TOP2B	ENSP00000396704
														PNKD	ENSP00000248451
														RAB6D	ENSP00000490038
														URGCP	ENSP00000392136
														MIER1	ENSP00000347514
														RTL8A	ENSP00000375267
														HNRNPUL2	ENSP00000301785
														FTO	ENSP00000418823
														GPR108	ENSP00000264080
														INTS1	ENSP00000385722
														RGP1	ENSP00000367318
														TMEM223	ENSP00000303987
														METTL23	ENSP00000482599
														SETD5	ENSP00000385852
														DNLZ	ENSP00000360803
														EARS2	ENSP00000395196
														PLOD3	ENSP00000223127
														MZT2A	ENSP00000311500
														UQCC3	ENSP00000367189
														CTNND1	ENSP00000382004
														MAP1LC3B2	ENSP00000450524
														AAMP	ENSP00000248450
														UQCRHL	ENSP00000485401
														ABCF1	ENSP00000391102
														ABCF1	ENSP00000373081
														ABCF1	ENSP00000365728
														ABCF1	ENSP00000404726
														ABCF1	ENSP00000393143
														ABCF1	ENSP00000389472
														ABCF1	ENSP00000403526
														ACLY	ENSP00000253792
														ZNF506	ENSP00000440625
														CCNK	ENSP00000374529
														POM121C	ENSP00000481575
														ULK3	ENSP00000400312
														RBIS	ENSP00000484101
														EIF5AL1	ENSP00000430706
														TMEM192	ENSP00000305069
														PDS5A	ENSP00000303427
														REX1BD	ENSP00000351422
														ACVR1	ENSP00000263640
														ZNF142	ENSP00000408643
														FBXO45	ENSP00000310332
														TMEM87A	ENSP00000305894
														NACA	ENSP00000349212
														TBC1D14	ENSP00000388886
														NCBP3	ENSP00000373657
														SZRD1	ENSP00000383866
														JMJD7	ENSP00000380467
														LIN54	ENSP00000421045
														KANSL3	ENSP00000396749
														KYAT1	ENSP00000317342
														ADK	ENSP00000361819
														ADPRH	ENSP00000349496
														AP1B1	ENSP00000350199
														AP1G1	ENSP00000299980
														PMS1	ENSP00000401064
														TPRN	ENSP00000387100
														PSMG4	ENSP00000413353
														LUZP6	ENSP00000468007
														TLE5	ENSP00000317537
														STMP1	ENSP00000425996
														TOMM6	ENSP00000381859
														ZNF397	ENSP00000331577
														TPRA1	ENSP00000347748
														R3HCC1	ENSP00000265806
														ATXN7L3B	ENSP00000430000
														CISD3	ENSP00000483781
														CISD3	ENSP00000484950
														ATXN1L	ENSP00000415822
														GHDC	ENSP00000399952
														FBRSL1	ENSP00000396160
														GSTK1	ENSP00000415813
														RPEL1	ENSP00000476672
														C2orf74	ENSP00000398725
														PHB2	ENSP00000441875
														ZNF814	ENSP00000410545
														USP27X	ENSP00000483631
														ZNF805	ENSP00000365414
														SMIM20	ENSP00000427407
														BORCS8	ENSP00000424833
														PARP9	ENSP00000418894
														TATDN1	ENSP00000428336
														SLC25A5	ENSP00000360671
														ANXA6	ENSP00000346550
														ANXA7	ENSP00000362012
														SETD6	ENSP00000219315
														NUDT2	ENSP00000368455
														FBXL17	ENSP00000437464
														RAB2B	ENSP00000380869
														COPS9	ENSP00000475979
														TMED7-TICAM2	ENSP00000282382
														ASXL1	ENSP00000493987
														PET117	ENSP00000397881
														IDE	ENSP00000360637
														BIRC2	ENSP00000227758
														NR3C2	ENSP00000423510
														XIAP	ENSP00000360242
														CXorf56	ENSP00000320345
														PET100	ENSP00000470539
														MCPH1	ENSP00000430962
														ARHGAP5	ENSP00000452222
														DGCR2	ENSP00000440062
														ZBED6	ENSP00000447879
														ARL1	ENSP00000261636
														ATP6AP1	ENSP00000358777
														BCAT2	ENSP00000322991
														IP6K2	ENSP00000414139
														BCL2L1	ENSP00000365223
														SIRT6	ENSP00000305310
														TUBD1	ENSP00000342399
														ANKRD28	ENSP00000485421
														CAMTA1	ENSP00000451388
														ZNF865	ENSP00000457715
														MLLT10	ENSP00000366304
														THAP3	ENSP00000311537
														ASCC1	ENSP00000378377
														RBM14-RBM4	ENSP00000388552
														ATP5MF-PTCD1	ENSP00000400168
														ARPIN-AP3S2	ENSP00000381377
														TRIM39-RPP21	ENSP00000485378
														RPP21	ENSP00000448191
														RPP21	ENSP00000446632
														RPP21	ENSP00000446993
														RPP21	ENSP00000447432
														RPP21	ENSP00000449807
														RPP21	ENSP00000448485
														TGIF2-RAB5IF	ENSP00000454021
														PMF1-BGLAP	ENSP00000357259
														GGCT	ENSP00000005374
														NEDD8-MDP1	ENSP00000431482
														NEDD8-MDP1	ENSP00000494449
														BCL2L2-PABPN1	ENSP00000451320
														PDK2
														ZNF513	ENSP00000384874
														ASB6	ENSP00000416172
														HSPE1-MOB4	ENSP00000474534
														SYNJ2BP-COX16	ENSP00000484161
														FNTB	ENSP00000246166
														NDUFC2-KCTD14	ENSP00000478766
														COMMD3-BMI1	ENSP00000473391
														ZHX1-C8orf76	ENSP00000349593
														ERCC5	ENSP00000473384
														SCNM1	ENSP00000473282
														ISY1-RAB43	ENSP00000411822
														BNIP1	ENSP00000239215
														KLF9	ENSP00000366330
														MAVS	ENSP00000413749
														ATF7	ENSP00000465192
														BTF3	ENSP00000338516
														C1QBP	ENSP00000225698
														CALU	ENSP00000249364
														CASP7	ENSP00000358324
														CASP9	ENSP00000330237
														CCNH	ENSP00000256897
														ACSS2	ENSP00000353804
														AC091390.4
														GLRX2	ENSP00000356410
														GFOD2	ENSP00000478260
														SLF2	ENSP00000476379
														CEP57	ENSP00000317487
														FMC1-LUC7L2	ENSP00000440222
														ENTPD6	ENSP00000365840
														BBS4	ENSP00000378631
														CDC5L	ENSP00000360532
														CYB5D2	ENSP00000458903
														CDC27	ENSP00000066544
														ZNF620	ENSP00000391472
														ARAF	ENSP00000366238
														PDLIM5	ENSP00000398469
														CSNK2A3	ENSP00000473553
														FBXW7	ENSP00000474751
														ATPSCKMT	ENSP00000420876
														CDK8	ENSP00000370938
														CDK9	ENSP00000362361
														AARSD1	ENSP00000400870
														MCU	ENSP00000440913
														STRIP1	ENSP00000358811
														IST1	ENSP00000368075
														TTC19	ENSP00000261647
														PEX11A	ENSP00000300056
														SMIM10L1
														SMIM10L1	ENSP00000488907
														THADA	ENSP00000385441
														ZNF138
														IKZF5	ENSP00000478056
														TRAP1	ENSP00000442070
														C16orf91	ENSP00000413100
														CHD4	ENSP00000440542
														NISCH	ENSP00000417812
														CHUK	ENSP00000359424
														TBCB	ENSP00000221855
														AP3S1	ENSP00000325369
														CLCN7	ENSP00000372193
														CLNS1A	ENSP00000433919
														CLPTM1	ENSP00000336994
														CPD	ENSP00000225719
														CSNK2B	ENSP00000400188
														CSNK2B	ENSP00000407018
														CSNK2B	ENSP00000390900
														CSNK2B	ENSP00000365042
														CSNK2B	ENSP00000415303
														CSNK2B	ENSP00000372925
														CSNK2B	ENSP00000415237
														CSTF1	ENSP00000217109
														CTBP1	ENSP00000290921
														DAD1	ENSP00000250498
														DARS	ENSP00000264161
														DAXX	ENSP00000382281
														DAXX	ENSP00000382014
														DAXX	ENSP00000410772
														DAXX	ENSP00000394108
														DAXX	ENSP00000363668
														DDX3X	ENSP00000494040
														DHX9	ENSP00000356520
														DHX15	ENSP00000336741
														DKC1	ENSP00000358563
														DNASE2	ENSP00000222219
														DPAGT1	ENSP00000346142
														DPH1	ENSP00000263083
														DPH2	ENSP00000255108
														DRG2	ENSP00000225729
														ECH1	ENSP00000221418
														ECH1	ENSP00000489530
														EIF4A1	ENSP00000293831
														EIF4G2	ENSP00000340281
														ELAVL1	ENSP00000385269
														EXTL3	ENSP00000220562
														XRCC6	ENSP00000353192
														BLOC1S1	ENSP00000447537
														GDI2	ENSP00000369538
														GCLC	ENSP00000497574
														GLE1	ENSP00000361856
														GTF2B	ENSP00000359531
														GTF2H4	ENSP00000259895
														GTF2H4	ENSP00000401105
														GTF2H4	ENSP00000396251
														GTF2H4	ENSP00000395497
														GTF2H4	ENSP00000403156
														GTF2H4	ENSP00000365504
														GTF2I	ENSP00000477837
														BRF1	ENSP00000448387
														GTF3C1	ENSP00000348510
														GTF3C2	ENSP00000264720
														HDAC2	ENSP00000430432
														HNRNPL	ENSP00000221419
														HNRNPL	ENSP00000489021
														HSBP1	ENSP00000392896
														NDST1	ENSP00000261797
														MRPL58	ENSP00000301585
														IFRD1	ENSP00000384477
														IL13RA1	ENSP00000360730
														EIF3E	ENSP00000220849
														IRAK1	ENSP00000358997
														AARS	ENSP00000261772
														PARP1	ENSP00000355759
														AK2	ENSP00000499935
														AMD1	ENSP00000357877
														APEH	ENSP00000296456
														APEX1	ENSP00000216714
														ARCN1	ENSP00000264028
														ARF1	ENSP00000272102
														ARF5	ENSP00000000233
														ARF6	ENSP00000298316
														RHOA	ENSP00000400175
														ARNT	ENSP00000351407
														ATF4	ENSP00000336790
														ATP5PF	ENSP00000382965
														ATP5F1B	ENSP00000262030
														ATP5F1D	ENSP00000215375
														ATP5PB	ENSP00000358737
														ATP5MC3	ENSP00000387317
														ATP6V0C	ENSP00000329757
														ATP6V1C1	ENSP00000430282
														ATP6V1E1	ENSP00000253413
														ATP5PO	ENSP00000290299
														AUH	ENSP00000364883
														BCL7B	ENSP00000223368
														BPGM	ENSP00000342032
														BSG	ENSP00000333769
														CANX	ENSP00000247461
														CANX	ENSP00000492868
														CAPNS1	ENSP00000246533
														CARS	ENSP00000488657
														CARS	ENSP00000380300
														CCT6A	ENSP00000275603
														CD63	ENSP00000257857
														CDC42	ENSP00000499457
														CEBPG	ENSP00000284000
														CENPB	ENSP00000369075
														CLCN3	ENSP00000424603
														CLTA	ENSP00000242284
														CLTB	ENSP00000310812
														COX4I1	ENSP00000253452
														COX5B	ENSP00000258424
														COX6B1	ENSP00000497926
														COX7A2	ENSP00000359098
														COX7C	ENSP00000247655
														ATF2	ENSP00000264110
														CSNK1A1	ENSP00000367074
														CSNK1D	ENSP00000324464
														CTNNA1	ENSP00000304669
														CTNNB1	ENSP00000344456
														CTSD	ENSP00000236671
														CUX1	ENSP00000484760
														CYC1	ENSP00000317159
														DBT	ENSP00000359151
														ECI1	ENSP00000301729
														DCTD	ENSP00000398194
														DDB1	ENSP00000301764
														DHPS	ENSP00000210060
														DLST	ENSP00000335304
														DR1	ENSP00000359295
														DUT	ENSP00000405160
														E2F4	ENSP00000368686
														EEF1B2	ENSP00000376056
														EEF1B2	ENSP00000490326
														EEF2	ENSP00000307940
														EIF5	ENSP00000216554
														EIF5A	ENSP00000336776
														ELK4	ENSP00000350681
														ERCC1	ENSP00000300853
														ESD	ENSP00000367992
														ETFB	ENSP00000311930
														ETV6	ENSP00000379658
														FDPS	ENSP00000357340
														FKBP3	ENSP00000379374
														FNTA	ENSP00000303423
														FNTB	ENSP00000246166
														KDSR	ENSP00000494352
														GABPB1	ENSP00000395771
														GALK2	ENSP00000453129
														GARS	ENSP00000373918
														GCLM	ENSP00000359258
														GNB1	ENSP00000367872
														GNS	ENSP00000258145
														GOLGA1	ENSP00000362656
														GPX4	ENSP00000346103
														GRSF1	ENSP00000254799
														GSK3B	ENSP00000324806
														GSPT1	ENSP00000398131
														GTF2F1	ENSP00000377969
														GTF3A	ENSP00000370532
														H2AFX	ENSP00000434024
														H2AFZ	ENSP00000296417
														HARS	ENSP00000425634
														HTT	ENSP00000347184
														HIVEP1	ENSP00000368698
														HMGB1	ENSP00000345347
														HMOX2	ENSP00000481811
														HMOX2	ENSP00000459214
														HNRNPA2B1	ENSP00000349101
														HNRNPD	ENSP00000313327
														RBMX	ENSP00000359645
														HNRNPK	ENSP00000365458
														HSPA4	ENSP00000302961
														IARS	ENSP00000364794
														IL6ST	ENSP00000370698
														ITGB1	ENSP00000303351
														EIF6	ENSP00000363574
														JAK1	ENSP00000343204
														CD82	ENSP00000227155
														KPNA1	ENSP00000343701
														KPNB1	ENSP00000290158
														TNPO1	ENSP00000336712
														LAMP2	ENSP00000200639
														LIG3	ENSP00000262327
														LIG4	ENSP00000349393
														LRPAP1	ENSP00000497444
														LSS	ENSP00000485757
														LSS	ENSP00000380837
														M6PR	ENSP00000000412
														MAGOH	ENSP00000360525
														MARK3	ENSP00000303698
														MAX	ENSP00000351490
														MAZ	ENSP00000313362
														MBD1	ENSP00000381502
														ME2	ENSP00000321070
														MGAT2	ENSP00000307423
														MGMT	ENSP00000498729
														MIF	ENSP00000215754
														MIF	ENSP00000482779
														MNAT1	ENSP00000261245
														MPG	ENSP00000219431
														MPI	ENSP00000318318
														MSH3	ENSP00000265081
														MTRR	ENSP00000402510
														MVD	ENSP00000301012
														NUBP1	ENSP00000283027
														NBN	ENSP00000265433
														NDUFA2	ENSP00000252102
														NDUFA4	ENSP00000339720
														NDUFA6	ENSP00000475402
														NDUFA6	ENSP00000487462
														NDUFA6	ENSP00000486781
														NDUFA6	ENSP00000418842
														NDUFA6	ENSP00000487431
														NDUFB3	ENSP00000237889
														NDUFB5	ENSP00000259037
														NDUFB6	ENSP00000369176
														NDUFC1	ENSP00000421195
														NDUFS4	ENSP00000296684
														NDUFS8	ENSP00000315774
														NFKBIB	ENSP00000312988
														NFKBIB	ENSP00000489138
														NFX1	ENSP00000368856
														NME2	ENSP00000426901
														NME3	ENSP00000219302
														OAZ2	ENSP00000463013
														ODC1	ENSP00000234111
														ORC4	ENSP00000376597
														OSBP	ENSP00000263847
														PEBP1	ENSP00000261313
														PRDX1	ENSP00000262746
														PAK2	ENSP00000314067
														PARN	ENSP00000387911
														PARN	ENSP00000478668
														PBX2	ENSP00000364190
														PBX2	ENSP00000372757
														PBX2	ENSP00000390009
														PBX2	ENSP00000403948
														PBX2	ENSP00000410710
														PBX2	ENSP00000397177
														PBX2	ENSP00000391745
														PCNA	ENSP00000368458
														PDCD2	ENSP00000439467
														PDE6D	ENSP00000287600
														PEX13	ENSP00000295030
														PFDN4	ENSP00000360473
														PFDN5	ENSP00000334188
														PHB	ENSP00000300408
														SLC25A3	ENSP00000383898
														PIGC	ENSP00000356701
														PIGF	ENSP00000281382
														PIK3C3	ENSP00000262039
														PI4KB	ENSP00000357869
														PLRG1	ENSP00000424417
														EXOSC10	ENSP00000307307
														PNN	ENSP00000216832
														POLG	ENSP00000268124
														POLR2E	ENSP00000478303
														POLR2G	ENSP00000301788
														PPM1B	ENSP00000282412
														PPP1CA	ENSP00000365936
														PPP1CC	ENSP00000335084
														PPP1R7	ENSP00000234038
														PPP1R8	ENSP00000236412
														PPP1R10	ENSP00000407310
														PPP1R10	ENSP00000373080
														PPP1R10	ENSP00000365694
														PPP1R10	ENSP00000389299
														PPP1R10	ENSP00000407181
														PPP1R10	ENSP00000413554
														PPP1R10	ENSP00000416060
														PPP2CA	ENSP00000418447
														PPP2R2A	ENSP00000370113
														PPP2R5C	ENSP00000333905
														PPP4C	ENSP00000279387
														PPP6C	ENSP00000362648
														PREP	ENSP00000499089
														PRKACA	ENSP00000309591
														PRKAG1	ENSP00000447433
														PRKAR1A	ENSP00000376475
														MAPK1	ENSP00000215832
														MAPK6	ENSP00000261845
														MAPK9	ENSP00000394560
														MAP2K1	ENSP00000302486
														MAP2K5	ENSP00000378859
														PRPS1	ENSP00000361512
														PRPSAP1	ENSP00000414624
														CHMP1A	ENSP00000380998
														PSMA1	ENSP00000379676
														PSMA2	ENSP00000223321
														PSMA3	ENSP00000216455
														PSMA4	ENSP00000044462
														PSMA5	ENSP00000271308
														PSMA6	ENSP00000261479
														PSMA7	ENSP00000359910
														PSMB1	ENSP00000262193
														PSMB2	ENSP00000362334
														PSMB3	ENSP00000483688
														PSMB3	ENSP00000483956
														PSMB4	ENSP00000290541
														PSMB5	ENSP00000355325
														PSMB6	ENSP00000270586
														PSMB7	ENSP00000259457
														PSMC2	ENSP00000292644
														PSMC3	ENSP00000481029
														PSMC5	ENSP00000310572
														PSMC6	ENSP00000401802
														PSMD1	ENSP00000309474
														PSMD2	ENSP00000310129
														PSMD3	ENSP00000264639
														PSMD4	ENSP00000357879
														PSMD7	ENSP00000219313
														PSMD8	ENSP00000481136
														PSMD9	ENSP00000440485
														PSMD10	ENSP00000217958
														PSMD11	ENSP00000261712
														PSMD12	ENSP00000348442
														PSMD13	ENSP00000436186
														QSOX1	ENSP00000356574
														PTPN1	ENSP00000360683
														PTPN11	ENSP00000340944
														RAD1	ENSP00000371469
														PEX19	ENSP00000357051
														ABCD3	ENSP00000359233
														RAB2A	ENSP00000262646
														RAB5B	ENSP00000353444
														RAB6A	ENSP00000311449
														RAD17	ENSP00000477996
														RAD17	ENSP00000303134
														RAD23B	ENSP00000350708
														RAD51C	ENSP00000391450
														RAF1	ENSP00000251849
														RANBP1	ENSP00000327583
														RANGAP1	ENSP00000348577
														RAP1A	ENSP00000358723
														RARS	ENSP00000231572
														RBBP7	ENSP00000369427
														RBM4	ENSP00000309166
														RCN2	ENSP00000378349
														NELFE	ENSP00000393005
														NELFE	ENSP00000364578
														NELFE	ENSP00000394879
														NELFE	ENSP00000372834
														NELFE	ENSP00000372660
														NELFE	ENSP00000403623
														RDX	ENSP00000496503
														UPF1	ENSP00000262803
														RFC1	ENSP00000261424
														RFC2	ENSP00000275627
														RFNG	ENSP00000307971
														RING1	ENSP00000372699
														RING1	ENSP00000412190
														RING1	ENSP00000400572
														RING1	ENSP00000363787
														RING1	ENSP00000396439
														RING1	ENSP00000396271
														RNASEH1	ENSP00000313350
														RNF4	ENSP00000315212
														RNH1	ENSP00000380739
														RNH1	ENSP00000479966
														ABCE1	ENSP00000296577
														RPA2	ENSP00000363021
														RPA3	ENSP00000223129
														MRPL12	ENSP00000333837
														RPN1	ENSP00000296255
														RPN2	ENSP00000237530
														RXRA	ENSP00000419692
														ATXN2	ENSP00000500649
														SDHB	ENSP00000364649
														SDHC	ENSP00000356953
														SDHD	ENSP00000364699
														SET	ENSP00000318012
														SRSF2	ENSP00000376276
														SRSF3	ENSP00000362820
														SGTA	ENSP00000221566
														SIAH1	ENSP00000378214
														SMARCA2	ENSP00000265773
														SMARCA4	ENSP00000343896
														SMARCB1	ENSP00000494049
														SMARCB1	ENSP00000479330
														SMARCE1	ENSP00000323967
														SNRNP70	ENSP00000472998
														SNRPB	ENSP00000370746
														SNRPB2	ENSP00000246071
														SNRPC	ENSP00000244520
														SNRPG	ENSP00000272348
														SNX2	ENSP00000368831
														UAP1	ENSP00000356903
														SPG7	ENSP00000495795
														SRM	ENSP00000366156
														SRP9	ENSP00000305230
														SRP14	ENSP00000267884
														SRP19	ENSP00000424870
														SRP54	ENSP00000216774
														SRPRA	ENSP00000328023
														SSB	ENSP00000260956
														SSBP1	ENSP00000460028
														SSBP1	ENSP00000265304
														SSR1	ENSP00000244763
														SSR2	ENSP00000295702
														SSRP1	ENSP00000278412
														STAT3	ENSP00000384943
														STIM1	ENSP00000300737
														NEK4	ENSP00000233027
														RPS6KB1	ENSP00000225577
														STX5	ENSP00000294179
														SUPT4H1	ENSP00000225504
														SUPT5H	ENSP00000469090
														SUPT6H	ENSP00000319104
														SUPV3L1	ENSP00000352678
														SURF1	ENSP00000361042
														SURF1	ENSP00000487158
														TAF4	ENSP00000252996
														TAF4	ENSP00000487182
														TAF9	ENSP00000477611
														TAF9	ENSP00000217893
														MAP3K7	ENSP00000358338
														TAPBP	ENSP00000402087
														TAPBP	ENSP00000372685
														TAPBP	ENSP00000363700
														TAPBP	ENSP00000372543
														TAPBP	ENSP00000395701
														TBCC	ENSP00000361967
														TBCE	ENSP00000494796
														TBCE	ENSP00000488933
														ELOA	ENSP00000484196
														TFAM	ENSP00000420588
														TEF	ENSP00000266304
														TMBIM6	ENSP00000267115
														ARFRP1	ENSP00000483486
														THOP1	ENSP00000304467
														TIAL1	ENSP00000394902
														SEC62	ENSP00000337688
														TRAPPC10	ENSP00000291574
														TOP1	ENSP00000354522
														TPD52L2	ENSP00000343547
														TPP2	ENSP00000365233
														NR2C1	ENSP00000333275
														TSPYL1	ENSP00000357597
														TSTA3	ENSP00000478042
														TSTA3	ENSP00000398803
														TTC1	ENSP00000231238
														DNAJC7	ENSP00000406463
														TUFM	ENSP00000322439
														TXNRD1	ENSP00000435929
														TYK2	ENSP00000431885
														UBA52	ENSP00000388107
														UBA1	ENSP00000338413
														UBE2A	ENSP00000360613
														UBE2B	ENSP00000265339
														UBE2D2	ENSP00000381717
														UBE2D3	ENSP00000378280
														UBE2E1	ENSP00000303709
														UBE2G2	ENSP00000338348
														UBE2H	ENSP00000347836
														UBE2I	ENSP00000380649
														UBE2L3	ENSP00000344259
														UBE2N	ENSP00000316176
														UBE2V2	ENSP00000428209
														SUMO1	ENSP00000376077
														UNG	ENSP00000337398
														USP4	ENSP00000265560
														UQCRC1	ENSP00000203407
														UQCRC2	ENSP00000268379
														USF2	ENSP00000222305
														VBP1	ENSP00000286428
														XPO1	ENSP00000384863
														YY1	ENSP00000262238
														YWHAB	ENSP00000361930
														ZBTB14	ENSP00000349503
														ZNF7	ENSP00000432724
														CNBP	ENSP00000410619
														ZNF37A	ENSP00000354377
														MZF1	ENSP00000469493
														ZNF76	ENSP00000363064
														ZNF91	ENSP00000300619
														ZNF131	ENSP00000305804
														ZNF134	ENSP00000379464
														ZKSCAN1	ENSP00000323148
														ZNF143	ENSP00000379847
														ZBTB17	ENSP00000364895
														TRIM26	ENSP00000410446
														TRIM26	ENSP00000389203
														TRIM26	ENSP00000407294
														TRIM26	ENSP00000407876
														TRIM26	ENSP00000392805
														TRIM26	ENSP00000331131
														TRIM26	ENSP00000408233
														TRIM26	ENSP00000415755
														ZNF174	ENSP00000268655
														ZMYM2	ENSP00000372327
														ZNF207	ENSP00000322777
														USP7	ENSP00000343535
														DEK	ENSP00000498653
														STAM	ENSP00000366746
														PDHX	ENSP00000227868
														CUL5	ENSP00000376808
														USP5	ENSP00000373883
														TAF15	ENSP00000488684
														TAF15	ENSP00000474609
														NRIP1	ENSP00000327213
														NAA10	ENSP00000417763
														TMEM187	ENSP00000358999
														ACOX3	ENSP00000348775
														AXIN1	ENSP00000262320
														HIST1H2BC	ENSP00000380180
														PIP5K1A	ENSP00000271663
														SLC25A11	ENSP00000225665
														SPOP	ENSP00000377001
														ULK1	ENSP00000324560
														VAPA	ENSP00000345656
														DUSP11	ENSP00000272444
														DHX16	ENSP00000390938
														DHX16	ENSP00000391789
														DHX16	ENSP00000396193
														DHX16	ENSP00000393958
														DHX16	ENSP00000365625
														DHX16	ENSP00000373071
														DHX16	ENSP00000408956
														DHX16	ENSP00000389862
														CUL4B	ENSP00000384109
														CUL4A	ENSP00000389118
														CUL2	ENSP00000363881
														CUL1	ENSP00000326804
														TPST2	ENSP00000339813
														RANBP3	ENSP00000404837
														PPFIA1	ENSP00000253925
														HAT1	ENSP00000264108
														COPS3	ENSP00000268717
														AGPS	ENSP00000264167
														CGGBP1	ENSP00000381428
														AP3B1	ENSP00000255194
														BLZF1	ENSP00000327541
														MAPKAPK5	ENSP00000449667
														PRPF18	ENSP00000367835
														DEGS1	ENSP00000316476
														DENR	ENSP00000280557
														THOC5	ENSP00000420306
														YARS	ENSP00000362576
														RRP1	ENSP00000417464
														MKNK1	ENSP00000361014
														KHSRP	ENSP00000381216
														AKR7A2	ENSP00000235835
														NOP14	ENSP00000315674
														RUVBL1	ENSP00000318297
														CDK13	ENSP00000181839
														RFXANK	ENSP00000305071
														RTCA	ENSP00000359146
														SSNA1	ENSP00000313752
														NCOA1	ENSP00000385216
														EIF3A	ENSP00000358140
														EIF3B	ENSP00000380206
														EIF3D	ENSP00000216190
														EIF3G	ENSP00000253108
														EIF3H	ENSP00000429931
														EIF3I	ENSP00000362688
														EIF3J	ENSP00000261868
														EIF4G3	ENSP00000264211
														STX10	ENSP00000466298
														BECN1	ENSP00000355231
														MRPL40	ENSP00000333401
														B4GALT3	ENSP00000320965
														MBTPS1	ENSP00000344223
														EDF1	ENSP00000224073
														SNX4	ENSP00000251775
														SNX3	ENSP00000230085
														URI1	ENSP00000376097
														EED	ENSP00000263360
														GPAA1	ENSP00000347206
														RIPK1	ENSP00000369773
														CRADD	ENSP00000327647
														CDS2	ENSP00000419879
														FADD	ENSP00000301838
														SNAP23	ENSP00000249647
														NAPA	ENSP00000263354
														MTMR1	ENSP00000359417
														RIOK3	ENSP00000341874
														FPGT	ENSP00000359935
														PEX11B	ENSP00000358312
														SUCLG2	ENSP00000307432
														SUCLG1	ENSP00000377446
														SUCLA2	ENSP00000494360
														CREG1	ENSP00000359540
														DPM1	ENSP00000360644
														BANF1	ENSP00000310275
														DCAF5	ENSP00000341351
														SAP30	ENSP00000296504
														HDAC3	ENSP00000302967
														KAT2B	ENSP00000263754
														SGPL1	ENSP00000362298
														FUBP1	ENSP00000359804
														CDC16	ENSP00000348554
														ZPR1	ENSP00000227322
														NAE1	ENSP00000290810
														MCM3AP	ENSP00000291688
														EIF2B5	ENSP00000497160
														EIF2S2	ENSP00000364119
														CPNE3	ENSP00000477590
														PRPF4B	ENSP00000337194
														CPNE1	ENSP00000317257
														MBD4	ENSP00000249910
														MBD2	ENSP00000256429
														AP3D1	ENSP00000344055
														ATP6V0E1	ENSP00000429690
														RPS6KB2	ENSP00000308413
														UBA3	ENSP00000354340
														UBE2M	ENSP00000253023
														SPAG9	ENSP00000349636
														RPL14	ENSP00000345156
														AIP	ENSP00000279146
														CLK3	ENSP00000344112
														ACOX1	ENSP00000293217
														RHOB	ENSP00000272233
														ATIC	ENSP00000236959
														ATOX1	ENSP00000316854
														ATP5F1A	ENSP00000381736
														ATP6V0B	ENSP00000431605
														CCNG1	ENSP00000344635
														AP2M1	ENSP00000292807
														AP2S1	ENSP00000263270
														COX8A	ENSP00000321260
														DLG1	ENSP00000345731
														ECHS1	ENSP00000357535
														EIF2S1	ENSP00000256383
														STOM	ENSP00000286713
														FDX1	ENSP00000260270
														FEN1	ENSP00000305480
														GPS1	ENSP00000302873
														GTF2F2	ENSP00000340823
														HSPA9	ENSP00000297185
														IDH3G	ENSP00000217901
														IREB2	ENSP00000258886
														NDUFB7	ENSP00000215565
														NINJ1	ENSP00000364595
														OAZ1	ENSP00000473381
														RAB1A	ENSP00000387286
														RAB5A	ENSP00000273047
														SDHA	ENSP00000264932
														SNRPD3	ENSP00000215829
														TANK	ENSP00000259075
														UXT	ENSP00000327797
														KDM5C	ENSP00000364550
														GBF1	ENSP00000359000
														SEC22C	ENSP00000273156
														FIBP	ENSP00000350124
														EBAG9	ENSP00000337675
														RAB11B	ENSP00000333547
														MED14	ENSP00000323720
														ATP6V1F	ENSP00000249289
														SOCS6	ENSP00000381034
														COPS2	ENSP00000373553
														TRIP12	ENSP00000283943
														HMGN3	ENSP00000341267
														EFTUD2	ENSP00000392094
														RAB9A	ENSP00000420127
														MED21	ENSP00000282892
														MED7	ENSP00000286317
														MED20	ENSP00000265350
														PMPCB	ENSP00000249269
														EEF1E1	ENSP00000369038
														CHD1L	ENSP00000358262
														GOSR2	ENSP00000492751
														RNF14	ENSP00000378028
														ABCB7	ENSP00000253577
														ACP1	ENSP00000272065
														ACVR1B	ENSP00000257963
														ARHGDIA	ENSP00000269321
														GET3	ENSP00000349887
														BAD	ENSP00000378040
														BAG1	ENSP00000489189
														BCS1L	ENSP00000375959
														BNIP2	ENSP00000475320
														OSGIN2	ENSP00000297438
														CALR	ENSP00000320866
														CASP3	ENSP00000311032
														CD81	ENSP00000263645
														COPA	ENSP00000241704
														COX6C	ENSP00000428895
														COX11	ENSP00000299335
														COX15	ENSP00000359514
														CSNK1G3	ENSP00000354942
														DAG1	ENSP00000312435
														DDX10	ENSP00000314348
														DFFA	ENSP00000366237
														RCAN1	ENSP00000320768
														DVL3	ENSP00000316054
														E4F1	ENSP00000301727
														PHC2	ENSP00000362517
														ENDOG	ENSP00000361725
														ENSA	ENSP00000358010
														EPRS	ENSP00000355890
														ERH	ENSP00000451080
														ACSL3	ENSP00000350012
														BPTF	ENSP00000315454
														FARSA	ENSP00000320309
														FDFT1	ENSP00000220584
														FDFT1	ENSP00000496723
														FLOT2	ENSP00000378368
														GALNT2	ENSP00000355632
														GOLGA2	ENSP00000476265
														GOLGB1	ENSP00000341848
														GPS2	ENSP00000370104
														ARHGAP35	ENSP00000500409
														HSD17B10	ENSP00000168216
														HDGF	ENSP00000349878
														HNRNPAB	ENSP00000348093
														HNRNPC	ENSP00000450544
														HNRNPU	ENSP00000393151
														AGFG1	ENSP00000312059
														HUS1	ENSP00000258774
														IDI1	ENSP00000370748
														FOXK2	ENSP00000335677
														ILF2	ENSP00000355011
														MGST3	ENSP00000356864
														NARS	ENSP00000256854
														NDUFA3	ENSP00000483683
														NDUFA3	ENSP00000418438
														AC012314.1	ENSP00000477919
														AC012314.14	ENSP00000480437
														AC012314.12	ENSP00000478119
														AC012314.11	ENSP00000483934
														AC012314.26	ENSP00000482015
														AC012314.22	ENSP00000483002
														AC012314.18	ENSP00000484436
														AC012314.5	ENSP00000481545
														NDUFA10	ENSP00000252711
														NDUFB2	ENSP00000247866
														NDUFB4	ENSP00000184266
														NDUFB10	ENSP00000268668
														NDUFC2	ENSP00000281031
														NDUFS2	ENSP00000356972
														NDUFS3	ENSP00000263774
														NDUFS5	ENSP00000362060
														NDUFS6	ENSP00000274137
														PEX14	ENSP00000349016
														SERPINB6	ENSP00000369912
														PIGH	ENSP00000216452
														RAB4A	ENSP00000355651
														RABGGTA	ENSP00000382341
														RABGGTA	ENSP00000494636
														RABGGTB	ENSP00000317473
														RAB5C	ENSP00000345689
														RPS6KA3	ENSP00000368884
														SCO1	ENSP00000255390
														SFSWAP	ENSP00000261674
														TRA2B	ENSP00000416959
														SNRPA	ENSP00000243563
														SNRPD2	ENSP00000465216
														SREBF2	ENSP00000354476
														STAU1	ENSP00000345425
														STX4	ENSP00000317714
														TBCA	ENSP00000369736
														TRAF6	ENSP00000433623
														TSN	ENSP00000374332
														TTC4	ENSP00000360329
														GET1	ENSP00000496813
														SF1	ENSP00000366607
														DAP3	ENSP00000357320
														BRPF1	ENSP00000410210
														RAB7A	ENSP00000265062
														PRRC2A	ENSP00000365201
														PRRC2A	ENSP00000404619
														PRRC2A	ENSP00000387910
														PRRC2A	ENSP00000408226
														PRRC2A	ENSP00000415363
														PRRC2A	ENSP00000372947
														PRRC2A	ENSP00000415182
														BAG6	ENSP00000415427
														BAG6	ENSP00000365131
														BAG6	ENSP00000354368
														BAG6	ENSP00000413327
														BAG6	ENSP00000397894
														BAG6	ENSP00000390966
														BAG6	ENSP00000413341
														DDX39B	ENSP00000383152
														DDX39B	ENSP00000391463
														DDX39B	ENSP00000405560
														DDX39B	ENSP00000406348
														DDX39B	ENSP00000390999
														DDX39B	ENSP00000379475
														DDX39B	ENSP00000399030
														DDX39B	ENSP00000387994
														CDK2AP1	ENSP00000261692
														PABPN1	ENSP00000216727
														GATD3A	ENSP00000291577
														BAP1	ENSP00000417132
														CDC23	ENSP00000378350
														RAB11A	ENSP00000261890
														ASH2L	ENSP00000340896
														MTMR6	ENSP00000371221
														ATP6V0D1	ENSP00000290949
														PRPF4	ENSP00000363313
														PRPF3	ENSP00000315379
														FAM50A	ENSP00000377225
														RABEP1	ENSP00000445408
														ATG12	ENSP00000425107
														PDCD5	ENSP00000466214
														HGS	ENSP00000331201
														PCSK7	ENSP00000325917
														COX7A2L	ENSP00000234301
														SCAF11	ENSP00000358374
														ZW10	ENSP00000200135
														BUB3	ENSP00000357858
														DDX21	ENSP00000346120
														ETF1	ENSP00000353741
														VAPB	ENSP00000417175
														MTA2	ENSP00000278823
														NOLC1	ENSP00000474710
														CCPG1	ENSP00000311656
														TBRG4	ENSP00000258770
														AIMP1	ENSP00000350699
														MAPKAPK2	ENSP00000294981
														COPB2	ENSP00000329419
														SRSF11	ENSP00000359988
														ZNHIT3	ENSP00000484687
														ZNHIT3	ENSP00000481504
														B4GALT5	ENSP00000360776
														VAMP3	ENSP00000054666
														SNAP29	ENSP00000215730
														TAOK2	ENSP00000279394
														TXNL1	ENSP00000217515
														UBE4A	ENSP00000387362
														PPIG	ENSP00000260970
														LONP1	ENSP00000353826
														TM9SF2	ENSP00000365567
														CIAO1	ENSP00000418287
														POLR2D	ENSP00000272645
														HS6ST1	ENSP00000259241
														STOML1	ENSP00000442478
														PEX16	ENSP00000368024
														SNRNP40	ENSP00000263694
														DDX23	ENSP00000310723
														SYMPK	ENSP00000245934
														CDYL	ENSP00000380718
														GSTO1	ENSP00000358727
														MAP4K4	ENSP00000489579
														EIF2AK3	ENSP00000307235
														EIF4E2	ENSP00000258416
														ATG5	ENSP00000358072
														STX8	ENSP00000305255
														CLTC	ENSP00000269122
														MPDU1	ENSP00000250124
														GOSR1	ENSP00000225724
														TMEM59	ENSP00000234831
														BAG4	ENSP00000287322
														EI24	ENSP00000278903
														CIR1	ENSP00000339723
														ATP6V1G1	ENSP00000363162
														ATP5MF	ENSP00000292475
														SPAG7	ENSP00000206020
														MRPL33	ENSP00000296102
														SEC22B	ENSP00000463393
														H2AFY	ENSP00000302572
														ATP5MPL	ENSP00000286953
														VPS26A	ENSP00000263559
														CLOCK	ENSP00000426983
														BABAM2	ENSP00000343412
														ENTPD4	ENSP00000351520
														RBM39	ENSP00000354437
														PRDX6	ENSP00000342026
														WTAP	ENSP00000351141
														SEC24C	ENSP00000343405
														MRPL49	ENSP00000279242
														CFAP410	ENSP00000344566
														CAPZB	ENSP00000264202
														DDX1	ENSP00000233084
														DHX8	ENSP00000262415
														DNM2	ENSP00000352721
														EIF4G1	ENSP00000411826
														FPGS	ENSP00000362344
														HNRNPF	ENSP00000338477
														KTN1	ENSP00000391964
														MARS	ENSP00000262027
														MECP2	ENSP00000301948
														MYO1E	ENSP00000288235
														NDUFA5	ENSP00000347988
														NDUFA7	ENSP00000301457
														NDUFA9	ENSP00000266544
														NDUFB8	ENSP00000299166
														NDUFB9	ENSP00000276689
														NFKBIL1	ENSP00000365318
														NFKBIL1	ENSP00000411611
														NFKBIL1	ENSP00000396656
														NFKBIL1	ENSP00000394486
														NFKBIL1	ENSP00000383142
														NFKBIL1	ENSP00000395544
														NFKBIL1	ENSP00000408426
														SNU13	ENSP00000497142
														OXA1L	ENSP00000483491
														PCBP2	ENSP00000352438
														PCYT1A	ENSP00000292823
														PFN1	ENSP00000225655
														POLR2K	ENSP00000342889
														PPARA	ENSP00000385523
														PPID	ENSP00000303754
														PSMD5	ENSP00000210313
														PWP2	ENSP00000291576
														QARS	ENSP00000307567
														SEL1L	ENSP00000337053
														SIAH2	ENSP00000322457
														TLE1	ENSP00000365682
														SLC27A4	ENSP00000300456
														FEZ2	ENSP00000385112
														BRD2	ENSP00000401791
														BRD2	ENSP00000382445
														BRD2	ENSP00000363958
														BRD2	ENSP00000400369
														BRD2	ENSP00000391246
														BRD2	ENSP00000393706
														BRD2	ENSP00000449609
														RBM8A	ENSP00000463058
														WDR1	ENSP00000426725
														GOLGA5	ENSP00000163416
														THRAP3	ENSP00000346634
														MED13	ENSP00000380888
														NUP153	ENSP00000262077
														PPP4R1	ENSP00000383401
														SCO2	ENSP00000379046
														SART1	ENSP00000310448
														DNAJA3	ENSP00000477570
														DNAJA3	ENSP00000262375
														USP14	ENSP00000261601
														USP10	ENSP00000219473
														USP8	ENSP00000302239
														AKT1	ENSP00000450688
														ATF1	ENSP00000262053
														ATP5F1C	ENSP00000338568
														ATP5MC2	ENSP00000377878
														BMI1	ENSP00000365851
														CAPN1	ENSP00000279247
														CHKB	ENSP00000384400
														CRK	ENSP00000381942
														CRKL	ENSP00000346300
														DDOST	ENSP00000399457
														ELK1	ENSP00000247161
														CTTN	ENSP00000301843
														EWSR1	ENSP00000381031
														GFER	ENSP00000248114
														GNB2	ENSP00000305260
														RAPGEF1	ENSP00000361263
														GTF2H1	ENSP00000265963
														HAGH	ENSP00000380514
														HADH	ENSP00000312288
														HCCS	ENSP00000370139
														HCFC1	ENSP00000309555
														HDLBP	ENSP00000312042
														UBE2K	ENSP00000261427
														HINT1	ENSP00000304229
														HSPA5	ENSP00000324173
														JUND	ENSP00000252818
														SMAD4	ENSP00000341551
														NCL	ENSP00000318195
														NFIL3	ENSP00000297689
														PCMT1	ENSP00000497235
														RALA	ENSP00000005257
														SKIL	ENSP00000259119
														SLC20A1	ENSP00000272542
														MLF2	ENSP00000403941
														CNOT9	ENSP00000273064
														WDR46	ENSP00000372695
														WDR46	ENSP00000399454
														WDR46	ENSP00000402869
														WDR46	ENSP00000405614
														WDR46	ENSP00000363746
														ZRANB2	ENSP00000254821
														MED6	ENSP00000256379
														ACOT8	ENSP00000217455
														ABI1	ENSP00000365312
														GNPDA1	ENSP00000311876
														GNE	ENSP00000494141
														MED16	ENSP00000488309
														MED16	ENSP00000325612
														PIGK	ENSP00000359848
														PARP3	ENSP00000401511
														UBA2	ENSP00000246548
														SAE1	ENSP00000270225
														SCARB2	ENSP00000264896
														HNRNPH1	ENSP00000397797
														HNRNPH1	ENSP00000492076
														DNAJC4	ENSP00000396896
														IDH3A	ENSP00000299518
														INPP5A	ENSP00000357583
														KARS	ENSP00000303043
														LAMP1	ENSP00000333298
														LDHA	ENSP00000395337
														LMAN1	ENSP00000251047
														MEF2A	ENSP00000346389
														NIT1	ENSP00000356988
														RBBP4	ENSP00000362592
														REST	ENSP00000311816
														SRSF4	ENSP00000362900
														TAF11	ENSP00000354633
														TAF12	ENSP00000362930
														TAF13	ENSP00000355051
														ELOC	ENSP00000428171
														TCF20	ENSP00000460328
														TCF20	ENSP00000483199
														TCF20	ENSP00000352463
														TCF20	ENSP00000487296
														TCF20	ENSP00000487302
														TCF20	ENSP00000489614
														TCF20	ENSP00000489215
														TCF20	ENSP00000490305
														TERF2	ENSP00000254942
														TFCP2	ENSP00000257915
														UFD1	ENSP00000263202
														SLC35A2	ENSP00000247138
														VDAC3	ENSP00000022615
														RNF103	ENSP00000237455
														REEP5	ENSP00000368959
														RBM10	ENSP00000366829
														FARSB	ENSP00000281828
														DNM1L	ENSP00000266481
														ABCF2	ENSP00000222388
														SCAMP2	ENSP00000268099
														SCAMP3	ENSP00000461521
														SCAMP3	ENSP00000307275
														SNUPN	ENSP00000309831
														ERAL1	ENSP00000254928
														TSSC4	ENSP00000331087
														PQBP1	ENSP00000218224
														GIPC1	ENSP00000376753
														TSFM	ENSP00000499171
														PPIF	ENSP00000225174
														CTDSP2	ENSP00000381148
														ARPC2	ENSP00000295685
														RAD50	ENSP00000368100
														ACTR1B	ENSP00000289228
														ACTR1A	ENSP00000358921
														ARIH1	ENSP00000369217
														BCAP31	ENSP00000499882
														NAMPT	ENSP00000222553
														YAF2	ENSP00000439256
														TOB1	ENSP00000427695
														AKAP9	ENSP00000348573
														G3BP1	ENSP00000348578
														CEBPZ	ENSP00000234170
														TRIM28	ENSP00000253024
														LPCAT3	ENSP00000261407
														CNIH1	ENSP00000216416
														RBM6	ENSP00000266022
														RBM5	ENSP00000343054
														ALYREF	ENSP00000421592
														TXNDC9	ENSP00000264255
														PSME3	ENSP00000466794
														MPHOSPH10	ENSP00000244230
														NME6	ENSP00000416658
														NUTF2	ENSP00000219169
														EIF1	ENSP00000419449
														TOPORS	ENSP00000353735
														FLOT1	ENSP00000372873
														FLOT1	ENSP00000391438
														FLOT1	ENSP00000393767
														FLOT1	ENSP00000388861
														FLOT1	ENSP00000365569
														FLOT1	ENSP00000410658
														FLOT1	ENSP00000373056
														PSMD14	ENSP00000386541
														PRDX2	ENSP00000301522
														PLIN3	ENSP00000221957
														HNRNPR	ENSP00000304405
														HNRNPR	ENSP00000489252
														SLC35B1	ENSP00000240333
														DCAF7	ENSP00000483236
														AP3S2	ENSP00000338777
														MRPS31	ENSP00000315397
														CALCOCO2	ENSP00000258947
														RABEPK	ENSP00000362639
														TIMM17B	ENSP00000365766
														POP7	ENSP00000304353
														SRRM1	ENSP00000326261
														STAM2	ENSP00000263904
														DENND4A	ENSP00000396830
														SF3B4	ENSP00000271628
														ZMPSTE24	ENSP00000361845
														AKAP8	ENSP00000269701
														PURA	ENSP00000332706
														STUB1	ENSP00000219548
														SIGMAR1	ENSP00000277010
														SAP18	ENSP00000481842
														SMNDC1	ENSP00000358616
														BCAS2	ENSP00000358554
														EIF1B	ENSP00000232905
														SF3A1	ENSP00000215793
														DNAJA2	ENSP00000314030
														BCKDK	ENSP00000219794
														MAEA	ENSP00000264750
														MARCH6	ENSP00000274140
														GOLGA3	ENSP00000204726
														CAPRIN1	ENSP00000340329
														NBR1	ENSP00000466667
														SMAD2	ENSP00000262160
														SMAD5	ENSP00000441954
														MCM7	ENSP00000307288
														MFAP1	ENSP00000267812
														MFAP3	ENSP00000322956
														MIA2	ENSP00000280083
														MLLT1	ENSP00000252674
														MXI1	ENSP00000239007
														HNRNPM	ENSP00000325376
														NAP1L4	ENSP00000483728
														NAP1L4	ENSP00000369915
														PRCC	ENSP00000271526
														RNF6	ENSP00000371000
														TSPAN31	ENSP00000257910
														TBCD	ENSP00000347719
														VPS72	ENSP00000357887
														CCT3	ENSP00000295688
														TSNAX	ENSP00000355599
														UCHL3	ENSP00000366819
														ZFAND5	ENSP00000366159
														CLPP	ENSP00000245816
														LAGE3	ENSP00000349923
														CD164	ENSP00000309376
														ALKBH1	ENSP00000216489
														CDC123	ENSP00000281141
														TAX1BP1	ENSP00000379612
														H1FX	ENSP00000329662
														SPATA2	ENSP00000289431
														HDAC6	ENSP00000334061
														RBM12	ENSP00000363228
														UBE4B	ENSP00000253251
														SNAPC5	ENSP00000457892
														VPS26C	ENSP00000311399
														TNIP1	ENSP00000430760
														AKR1A1	ENSP00000361140
														EMC8	ENSP00000253457
														TFG	ENSP00000240851
														MICU1	ENSP00000493232
														TUBA1B	ENSP00000336799
														BPNT1	ENSP00000318852
														LUC7L3	ENSP00000240304
														PRMT5	ENSP00000319169
														PPIE	ENSP00000312769
														TOMM40	ENSP00000410339
														TAB1	ENSP00000216160
														ECI2	ENSP00000354737
														HAX1	ENSP00000329002
														MAN2A2	ENSP00000452948
														TMEM50B	ENSP00000460121
														TMEM50B	ENSP00000439768
														CAPZA2	ENSP00000354947
														NCK1	ENSP00000417273
														NEDD8	ENSP00000250495
														NEDD8	ENSP00000496420
														NFE2L2	ENSP00000380252
														NFYB	ENSP00000240055
														NOP2	ENSP00000382392
														NUCB1	ENSP00000385923
														PA2G4	ENSP00000302886
														PCBP1	ENSP00000305556
														PCM1	ENSP00000327077
														CDK16	ENSP00000349762
														PIK3CB	ENSP00000289153
														PIN1	ENSP00000247970
														PITPNA	ENSP00000316809
														POLD2	ENSP00000480186
														POLR2H	ENSP00000392913
														POLR2I	ENSP00000221859
														POLR2J	ENSP00000292614
														PPARD	ENSP00000353916
														PPP2R5A	ENSP00000261461
														PPP2R5B	ENSP00000164133
														PPP2R5D	ENSP00000417963
														PPP2R5E	ENSP00000337641
														PPP5C	ENSP00000012443
														PRKAA1	ENSP00000380317
														PRKAB1	ENSP00000229328
														DNAJC3	ENSP00000473631
														PSME1	ENSP00000206451
														PSME1	ENSP00000495095
														RANBP2	ENSP00000283195
														TAF10	ENSP00000299424
														TSG101	ENSP00000251968
														UQCRB	ENSP00000287022
														VRK2	ENSP00000342381
														MOGS	ENSP00000410992
														ANP32A	ENSP00000417864
														SMC1A	ENSP00000323421
														NCOR1	ENSP00000268712
														CDIPT	ENSP00000219789
														PGRMC2	ENSP00000296425
														ARIH2	ENSP00000348769
														SEC24B	ENSP00000265175
														RAN	ENSP00000446215
														RBM14	ENSP00000311747
														EMG1	ENSP00000470560
														TIMM17A	ENSP00000356256
														MCRS1	ENSP00000345358
														HMG20B	ENSP00000328269
														MAD2L2	ENSP00000365882
														SLC30A9	ENSP00000264451
														PPIH	ENSP00000306614
														ZNHIT1	ENSP00000304593
														TIMM44	ENSP00000270538
														ZBTB18	ENSP00000481278
														TADA3	ENSP00000307684
														ATP5PD	ENSP00000301587
														UBE2E3	ENSP00000386788
														EIF3M	ENSP00000436049
														NXF1	ENSP00000294172
														SEC23A	ENSP00000306881
														CREB3	ENSP00000342136
														LRRC41	ENSP00000343298
														VTI1B	ENSP00000450731
														SYNCRIP	ENSP00000358635
														CIB1	ENSP00000333873
														DDX17	ENSP00000385536
														CHERP	ENSP00000439856
														KAT5	ENSP00000366245
														HYOU1	ENSP00000480150
														HYOU1	ENSP00000486825
														IPO8	ENSP00000256079
														IPO7	ENSP00000369042
														NOP56	ENSP00000370589
														ATG7	ENSP00000346437
														ZNRD2	ENSP00000312318
														DCTN2	ENSP00000408910
														ANP32B	ENSP00000345848
														LAMTOR5	ENSP00000480529
														TM9SF1	ENSP00000261789
														TM9SF1	ENSP00000494320
														ARPC1A	ENSP00000262942
														HTATIP2	ENSP00000397752
														AGPAT1	ENSP00000382728
														AGPAT1	ENSP00000407189
														AGPAT1	ENSP00000387810
														AGPAT1	ENSP00000387738
														AGPAT1	ENSP00000405864
														AGPAT1	ENSP00000388870
														AGPAT1	ENSP00000364248
														RPP30	ENSP00000360768
														RPP38	ENSP00000367444
														ARFGEF2	ENSP00000360985
														SIVA1	ENSP00000329213
														MRPL28	ENSP00000199706
														CCT7	ENSP00000258091
														CCT4	ENSP00000377958
														NPC2	ENSP00000451112
														DRAP1	ENSP00000307850
														PRPF8	ENSP00000304350
														PRPF8	ENSP00000479194
														USP16	ENSP00000382858
														PAIP1	ENSP00000302768
														PAICS	ENSP00000264221
														MXD4	ENSP00000337889
														TRIM3	ENSP00000352508
														HEXIM1	ENSP00000328773
														RBCK1	ENSP00000254960
														STAMBP	ENSP00000377636
														TGOLN2	ENSP00000366603
														POLR3C	ENSP00000334564
														IVNS1ABP	ENSP00000356468
														ATP5MG	ENSP00000300688
														POLH	ENSP00000361310
														PSMC4	ENSP00000157812
														PSMC4	ENSP00000487367
														TRIM27	ENSP00000366404
														TRIM27	ENSP00000414793
														TRIM27	ENSP00000416983
														TRIM27	ENSP00000405229
														TRIM27	ENSP00000392787
														TRIM27	ENSP00000383555
														RSC1A1	ENSP00000341963
														SARS	ENSP00000234677
														DYNLT1	ENSP00000356056
														TFE3	ENSP00000314129
														GLRX3	ENSP00000330836
														SPHAR	ENSP00000355649
														NPRL2	ENSP00000232501
														MTX2	ENSP00000249442
														YKT6	ENSP00000223369
														PMVK	ENSP00000357452
														KHDRBS1	ENSP00000313829
														CELF1	ENSP00000308386
														CTCF	ENSP00000264010
														FARS2	ENSP00000274680
														RRAGA	ENSP00000369899
														DCTN6	ENSP00000221114
														CCT8	ENSP00000286788
														USP39	ENSP00000312981
														AP4B1	ENSP00000256658
														API5	ENSP00000368129
														HSPA8	ENSP00000432083
														NUDC	ENSP00000319664
														PTGES3	ENSP00000262033
														HBS1L	ENSP00000356811
														ZMYND11	ENSP00000381053
														SRSF10	ENSP00000342913
														ZBTB6	ENSP00000362763
														POP4	ENSP00000465213
														VAMP5	ENSP00000305647
														SDCCAG8	ENSP00000355499
														SDCCAG8	ENSP00000483550
														ENTR1	ENSP00000298537
														UTP14A	ENSP00000377944
														TUBGCP2	ENSP00000357551
														CLPX	ENSP00000300107
														USP19	ENSP00000381863
														CPSF4	ENSP00000292476
														JTB	ENSP00000271843
														MAN1A2	ENSP00000348959
														TXNL4A	ENSP00000269601
														PNPLA6	ENSP00000221249
														NUDT3	ENSP00000476119
														SUGT1	ENSP00000308067
														TCERG1	ENSP00000296702
														GLO1	ENSP00000362463
														COPS8	ENSP00000346340
														FASTK	ENSP00000297532
														SUB1	ENSP00000265073
														MAN2C1	ENSP00000267978
														PSKH1	ENSP00000291041
														SURF6	ENSP00000361092
														SURF6	ENSP00000485909
														SYPL1	ENSP00000011473
														TALDO1	ENSP00000321259
														U2AF1	ENSP00000291552
														UGP2	ENSP00000338703
														YWHAE	ENSP00000264335
														YWHAE	ENSP00000487356
														LZTR1	ENSP00000496779
														LMO4	ENSP00000359575
														DDX18	ENSP00000263239
														ZBTB33	ENSP00000314153
														ZFPL1	ENSP00000294258
														WDR3	ENSP00000308179
														RALBP1	ENSP00000372924
														PRDX3	ENSP00000298510
														MSL3	ENSP00000498017
														SF3A3	ENSP00000362110
														STARD3	ENSP00000337446
														HNRNPA0	ENSP00000316042
														SEC61B	ENSP00000223641
														SERINC3	ENSP00000340243
														OS9	ENSP00000318165
														PSMF1	ENSP00000338039
														TMED2	ENSP00000262225
														STIP1	ENSP00000305958
														EBNA1BP2	ENSP00000236051
														CKAP4	ENSP00000367265
														TMED10	ENSP00000303145
														ASCC3	ENSP00000358159
														UQCR11	ENSP00000467262
														CLP1	ENSP00000434995
														COPS6	ENSP00000304102
														COPS5	ENSP00000350512
														METAP2	ENSP00000325312
														IMMT	ENSP00000387262
														SF3B2	ENSP00000318861
														ILVBL	ENSP00000263383
														SNRNP27	ENSP00000244227
														TMED1	ENSP00000214869
														LIAS	ENSP00000492260
														IFT27	ENSP00000343593
														ELF2	ENSP00000351458
														CALM1	ENSP00000349467
														EIF2D	ENSP00000271764
														IDH3B	ENSP00000370223
														RNF5	ENSP00000364235
														RNF5	ENSP00000413131
														RNF5	ENSP00000415127
														RNF5	ENSP00000415784
														RNF5	ENSP00000401172
														RNF5	ENSP00000387879
														RNF5	ENSP00000388795
														SDF2	ENSP00000247020
														SRSF1	ENSP00000258962
														ST3GAL2	ENSP00000345477
														SKIV2L	ENSP00000399530
														SKIV2L	ENSP00000364543
														SKIV2L	ENSP00000400626
														SKIV2L	ENSP00000372827
														SKIV2L	ENSP00000412310
														SKIV2L	ENSP00000394400
														SKP1	ENSP00000429472
														SUMO3	ENSP00000330343
														SNRPD1	ENSP00000300413
														SRP72	ENSP00000495128
														ZNF33A	ENSP00000402467
														ZNF22	ENSP00000298299
														ZNF24	ENSP00000261332
														ZNF32	ENSP00000363556
														ZBTB25	ENSP00000476746
														RNF113A	ENSP00000360497
														SLC39A7	ENSP00000372700
														SLC39A7	ENSP00000416439
														SLC39A7	ENSP00000410656
														SLC39A7	ENSP00000363809
														SLC39A7	ENSP00000414145
														SLC39A7	ENSP00000391735
														MAGED1	ENSP00000325333
														ZNF197	ENSP00000345809
														ZNF197	ENSP00000485709
														TENT4A	ENSP00000230859
														NUDT21	ENSP00000300291
														CPSF6	ENSP00000391774
														RTN4	ENSP00000378107
														WWP1	ENSP00000427793
														WWP2	ENSP00000352069
														TMEM115	ENSP00000266025
														DUSP14	ENSP00000478595
														DUSP14	ENSP00000478406
														RER1	ENSP00000475168
														HNRNPUL1	ENSP00000375863
														ATE1	ENSP00000358039
														RPP14	ENSP00000412894
														KRR1	ENSP00000229214
														FAF1	ENSP00000379457
														PWP1	ENSP00000387365
														CDC37	ENSP00000222005
														WDR45	ENSP00000348848
														FICD	ENSP00000446479
														LSM6	ENSP00000296581
														NDUFV1	ENSP00000322450
														RPL10A	ENSP00000363018
														UBL3	ENSP00000370055
														SSR3	ENSP00000265044
														ELOB	ENSP00000386652
														TFDP1	ENSP00000364519
														TMF1	ENSP00000381567
														NR1H2	ENSP00000253727
														VCP	ENSP00000351777
														ZNF41	ENSP00000366265
														ZNF146	ENSP00000392095
														ZNF195	ENSP00000346613
														ZXDA	ENSP00000351530
														ZXDB	ENSP00000364023
														PICALM	ENSP00000377015
														POMT1	ENSP00000361302
														ERG28	ENSP00000256319
														STRAP	ENSP00000392270
														WBP4	ENSP00000368801
														SEC23IP	ENSP00000358071
														PLPBP	ENSP00000333551
														MRPL3	ENSP00000264995
														RPL35	ENSP00000259469
														SEC63	ENSP00000357998
														PMF1	ENSP00000357260
														ZHX1	ENSP00000378938
														PACSIN2	ENSP00000385372
														DCTN3	ENSP00000259632
														XPOT	ENSP00000327821
														CHP1	ENSP00000335632
														PXMP4	ENSP00000386385
														SNF8	ENSP00000421380
														DDX19B	ENSP00000288071
														ATXN2L	ENSP00000338718
														PNKP	ENSP00000323511
														B4GALT7	ENSP00000029410
														PARK7	ENSP00000340278
														COPE	ENSP00000262812
														ECD	ENSP00000362070
														GPN1	ENSP00000476446
														STXBP3	ENSP00000359025
														TUSC2	ENSP00000232496
														CBX3	ENSP00000336687
														EXOC3	ENSP00000425587
														GABARAP	ENSP00000306866
														U2AF2	ENSP00000307863
														RNF13	ENSP00000341361
														GABARAPL2	ENSP00000037243
														NUP42	ENSP00000258742
														OGFR	ENSP00000290291
														ATF6	ENSP00000356919
														COG2	ENSP00000355629
														CASC3	ENSP00000264645
														NCBP2	ENSP00000326806
														NONO	ENSP00000276079
														RALY	ENSP00000364255
														RFC5	ENSP00000408295
														DDX42	ENSP00000464050
														SHOC2	ENSP00000358464
														TARDBP	ENSP00000240185
														COMMD3	ENSP00000366032
														CCT5	ENSP00000280326
														ELL2	ENSP00000237853
														GTF3C3	ENSP00000263956
														GTF3C5	ENSP00000361169
														PGLS	ENSP00000252603
														ABCB10	ENSP00000355637
														PRDX5	ENSP00000265462
														AP3M1	ENSP00000347408
														ARL5A	ENSP00000295087
														AHSA1	ENSP00000216479
														CBX5	ENSP00000209875
														MTO1	ENSP00000419561
														FAM50B	ENSP00000496837
														AATF	ENSP00000477848
														AATF	ENSP00000481894
														SERGEF	ENSP00000265965
														CCNDBP1	ENSP00000300213
														TFIP11	ENSP00000384421
														FBXL3	ENSP00000347834
														FBXL4	ENSP00000229971
														FBXL5	ENSP00000344866
														FBXL6	ENSP00000330098
														FBXL6	ENSP00000495082
														FBXW2	ENSP00000476369
														FBXO22	ENSP00000396442
														TSPAN17	ENSP00000309036
														FBXO3	ENSP00000265651
														FBXO7	ENSP00000266087
														FKBP8	ENSP00000476767
														TIMM10B	ENSP00000254616
														GLG1	ENSP00000205061
														GRHPR	ENSP00000313432
														HARS2	ENSP00000230771
														NUBP2	ENSP00000262302
														MSRB2	ENSP00000365693
														RAB3GAP1	ENSP00000264158
														SCAP	ENSP00000265565
														SIRT2	ENSP00000249396
														SIRT2	ENSP00000489602
														SIRT3	ENSP00000372191
														SIRT5	ENSP00000476228
														SNW1	ENSP00000261531
														SEPHS1	ENSP00000367893
														HBP1	ENSP00000222574
														HBP1	ENSP00000491311
														HS2ST1	ENSP00000359581
														RHBDD3	ENSP00000216085
														HSPBP1	ENSP00000398244
														PLD3	ENSP00000386938
														FTSJ1	ENSP00000326948
														MORF4L2	ENSP00000391969
														TLK1	ENSP00000411099
														FBXW11	ENSP00000265094
														AP2A2	ENSP00000413234
														AP2A2	ENSP00000487149
														AP2A2	ENSP00000487425
														KDM2A	ENSP00000432786
														LETM1	ENSP00000305653
														LSM4	ENSP00000469468
														LSM5	ENSP00000410758
														DNAJB9	ENSP00000249356
														MSRA	ENSP00000313921
														MSRA	ENSP00000493848
														NARF	ENSP00000309899
														GTPBP4	ENSP00000354040
														NUP62	ENSP00000407331
														TTC33	ENSP00000338533
														BLOC1S6	ENSP00000220531
														PEF1	ENSP00000362807
														PFDN2	ENSP00000356989
														PITPNB	ENSP00000334738
														ARFIP2	ENSP00000254584
														ANP32C
														ICMT	ENSP00000343552
														PRDM4	ENSP00000228437
														PICK1	ENSP00000349465
														H2AFV	ENSP00000308405
														RAB3GAP2	ENSP00000351832
														RANBP6	ENSP00000259569
														SF3B3	ENSP00000305790
														SETDB1	ENSP00000357965
														SF3B1	ENSP00000335321
														SNAPIN	ENSP00000357674
														TIMM10	ENSP00000257245
														TIMM13	ENSP00000215570
														TIMM8B	ENSP00000422122
														TIMM9	ENSP00000378588
														TINF2	ENSP00000382350
														TINF2	ENSP00000494089
														ATP6V0A2	ENSP00000332247
														PRPF6	ENSP00000266079
														TNPO3	ENSP00000265388
														TXN2	ENSP00000216185
														UCK2	ENSP00000356853
														WBP2	ENSP00000254806
														ZNF281	ENSP00000356322
														PDCD6	ENSP00000264933
														EIF3K	ENSP00000248342
														EIF3K	ENSP00000489438
														DROSHA	ENSP00000425979
														ATXN10	ENSP00000252934
														VPS4A	ENSP00000254950
														HTRA2	ENSP00000258080
														NXT1	ENSP00000254998
														TBK1	ENSP00000329967
														MKLN1	ENSP00000323527
														SAP30BP	ENSP00000462116
														BRD7	ENSP00000378180
														VPS51	ENSP00000279281
														POLL	ENSP00000299206
														MAT2B	ENSP00000325425
														POLM	ENSP00000242248
														GNL2	ENSP00000362153
														RBM15B	ENSP00000454545
														TRA2A	ENSP00000297071
														CNOT4	ENSP00000354673
														PRRC2B	ENSP00000349856
														UBIAD1	ENSP00000366006
														ATG4B	ENSP00000384259
														RMC1	ENSP00000269221
														PYCR2	ENSP00000342502
														PAXBP1	ENSP00000458262
														PAXBP1	ENSP00000290178
														EPN1	ENSP00000085079
														GMPPA	ENSP00000315925
														SEC61A1	ENSP00000243253
														TIMM22	ENSP00000320236
														TIMM22	ENSP00000482204
														TIMM22	ENSP00000478463
														ALG5	ENSP00000239891
														OLA1	ENSP00000284719
														TFPT	ENSP00000480169
														TFPT	ENSP00000375639
														TFPT	ENSP00000483971
														TFPT	ENSP00000480353
														TFPT	ENSP00000482185
[truncated: 2,224 more rows]

## Sheet: Membrane_proteins
Supplementary Table S3. Representation of transmembrane proteins
UniProt annotation & UniProt GO - Cellular component (state 8th to 11th of November 2019)
	SPERM				TESTIS				BODY1				BODY2				LIVER1				LIVER2
	Protein Stable ID	Multi-pass membrane protein	Multi- or single-pass membrane protein		Protein Stable ID	Multi-pass membrane protein	Multi- or single-pass membrane protein		Protein Stable ID	Multi-pass membrane protein	Multi- or single-pass membrane protein		Protein Stable ID	Multi-pass membrane protein	Multi- or single-pass membrane protein		Protein Stable ID	Multi-pass membrane protein	Multi- or single-pass membrane protein		Protein Stable ID	Multi-pass membrane protein	Multi- or single-pass membrane protein
Percentages of membrane proteins		7.79221	15.5844			10.3896	14.2857			12.987	18.1818			14.2857	18.1818			9.09091	14.2857			7.79221	16.8831
	ENSP00000220584	1	1		ENSP00000003084	1	1		ENSP00000162749	1	1		ENSP00000238788	1	1		ENSP00000294309	1	1		ENSP00000227155	1	1
	ENSP00000241041	1	1		ENSP00000287936	1	1		ENSP00000169298	1	1		ENSP00000262213	1	1		ENSP00000309432	1	1		ENSP00000261514	1	1
	ENSP00000309430	1	1		ENSP00000310688	1	1		ENSP00000256652	1	1		ENSP00000300571	1	1		ENSP00000363161	1	1		ENSP00000280734	1	1
	ENSP00000351717	1	1		ENSP00000317997	1	1		ENSP00000260010	1	1		ENSP00000308549	1	1		ENSP00000366395	1	1		ENSP00000340243	1	1
	ENSP00000266682	1	1		ENSP00000333821	1	1		ENSP00000261835	1	1		ENSP00000361536	1	1		ENSP00000372201	1	1		ENSP00000345728	1	1
	ENSP00000317000	1	1		ENSP00000338072	1	1		ENSP00000307607	1	1		ENSP00000380247	1	1		ENSP00000465894	1	1		ENSP00000406191	1	1
	ENSP00000263897		1		ENSP00000361666	1	1		ENSP00000315602	1	1		ENSP00000381237	1	1		ENSP00000475168	1	1		ENSP00000221466		1
	ENSP00000435466		1		ENSP00000384708	1	1		ENSP00000352561	1	1		ENSP00000382791	1	1		ENSP00000000412		1		ENSP00000261590		1
	ENSP00000370839		1		ENSP00000296255		1		ENSP00000354900	1	1		ENSP00000385083	1	1		ENSP00000344223		1		ENSP00000263686		1
	ENSP00000332118		1		ENSP00000346901		1		ENSP00000355938	1	1		ENSP00000393557	1	1		ENSP00000367123		1		ENSP00000266581		1
	ENSP00000317159		1		ENSP00000353224		1		ENSP00000258403		1		ENSP00000415481	1	1		ENSP00000451261		1		ENSP00000322730		1
	ENSP00000364133		1		ENSP00000211998				ENSP00000307046		1		ENSP00000027335		1		ENSP00000284240				ENSP00000357065		1
	ENSP00000342121				ENSP00000222553				ENSP00000310036		1		ENSP00000318472		1		ENSP00000361900				ENSP00000414237		1
	ENSP00000438262				ENSP00000227251				ENSP00000353679		1		ENSP00000356218		1		ENSP00000168216				ENSP00000232978
	ENSP00000333024				ENSP00000233710				ENSP00000224237				ENSP00000217233				ENSP00000219150				ENSP00000261647
	ENSP00000417653				ENSP00000236850				ENSP00000238714				ENSP00000229214				ENSP00000253382				ENSP00000265560
	ENSP00000333666				ENSP00000244061				ENSP00000250974				ENSP00000246957				ENSP00000254770				ENSP00000272519
	ENSP00000359799				ENSP00000261254				ENSP00000259748				ENSP00000258198				ENSP00000257904				ENSP00000289004
	ENSP00000260187				ENSP00000273398				ENSP00000264499				ENSP00000259089				ENSP00000261366				ENSP00000311427
	ENSP00000340093				ENSP00000276914				ENSP00000265560				ENSP00000262094				ENSP00000261889				ENSP00000314067
	ENSP00000415430				ENSP00000295688				ENSP00000272519				ENSP00000303252				ENSP00000264108				ENSP00000316032
	ENSP00000355237				ENSP00000302100				ENSP00000296543				ENSP00000355927				ENSP00000265381				ENSP00000318176
	ENSP00000219313				ENSP00000308938				ENSP00000297265				ENSP00000356832				ENSP00000265990				ENSP00000325312
	ENSP00000288937				ENSP00000311113				ENSP00000308944				ENSP00000369150				ENSP00000272322				ENSP00000333900
	ENSP00000309132				ENSP00000319308				ENSP00000309576				ENSP00000373340				ENSP00000288602				ENSP00000339958
	ENSP00000377390				ENSP00000327070				ENSP00000310406				ENSP00000375892				ENSP00000300134				ENSP00000351052
	ENSP00000231061				ENSP00000337853				ENSP00000320176				ENSP00000378324				ENSP00000304669				ENSP00000356481
	ENSP00000262507				ENSP00000345230				ENSP00000343785				ENSP00000397181				ENSP00000311300				ENSP00000360916
	ENSP00000342793				ENSP00000346032				ENSP00000346508				ENSP00000398495				ENSP00000318177				ENSP00000362010
	ENSP00000344668				ENSP00000351410				ENSP00000365569				ENSP00000440207				ENSP00000325612				ENSP00000362170
	ENSP00000347792				ENSP00000354837				ENSP00000382508				ENSP00000246785				ENSP00000328524				ENSP00000363921
	ENSP00000402584				ENSP00000354947				ENSP00000432768				ENSP00000005386				ENSP00000347184				ENSP00000365227
	ENSP00000342262				ENSP00000356771				ENSP00000440704				ENSP00000217133				ENSP00000350676				ENSP00000379601
	ENSP00000222120				ENSP00000357283				ENSP00000230792				ENSP00000225941				ENSP00000355541				ENSP00000387261
	ENSP00000348471				ENSP00000370023				ENSP00000246802				ENSP00000228510				ENSP00000357869				ENSP00000451752
	ENSP00000359925				ENSP00000377833				ENSP00000252456				ENSP00000237654				ENSP00000430684				ENSP00000074304
	ENSP00000200135				ENSP00000379895				ENSP00000252854				ENSP00000238616				ENSP00000438689				ENSP00000170447
	ENSP00000274376				ENSP00000445175				ENSP00000258281				ENSP00000260502				ENSP00000458663				ENSP00000210444
	ENSP00000473172				ENSP00000304467				ENSP00000261839				ENSP00000260570				ENSP00000231420				ENSP00000223145
	ENSP00000226105				ENSP00000005558				ENSP00000263468				ENSP00000262039				ENSP00000234827				ENSP00000232219
	ENSP00000249269				ENSP00000157600				ENSP00000265465				ENSP00000264144				ENSP00000238561				ENSP00000236925
	ENSP00000250244				ENSP00000196371				ENSP00000267064				ENSP00000264670				ENSP00000252597				ENSP00000240079
	ENSP00000261615				ENSP00000216254				ENSP00000269391				ENSP00000264711				ENSP00000258774				ENSP00000253109
	ENSP00000402608				ENSP00000218516				ENSP00000272732				ENSP00000264867				ENSP00000262715				ENSP00000253247
	ENSP00000321584				ENSP00000220166				ENSP00000274498				ENSP00000265036				ENSP00000264645				ENSP00000257566
	ENSP00000209873				ENSP00000242592				ENSP00000280362				ENSP00000266126				ENSP00000265404				ENSP00000259632
	ENSP00000367721				ENSP00000246949				ENSP00000295934				ENSP00000300026				ENSP00000273920				ENSP00000261267
	ENSP00000345917				ENSP00000258962				ENSP00000296824				ENSP00000300417				ENSP00000296473				ENSP00000263401
	ENSP00000347161				ENSP00000260129				ENSP00000300108				ENSP00000300650				ENSP00000298694				ENSP00000268058
	ENSP00000264708				ENSP00000261733				ENSP00000302276				ENSP00000305524				ENSP00000301149				ENSP00000271064
	ENSP00000252137				ENSP00000263579				ENSP00000304108				ENSP00000308576				ENSP00000331897				ENSP00000273588
	ENSP00000358045				ENSP00000265983				ENSP00000306561				ENSP00000314420				ENSP00000338348				ENSP00000274849
	ENSP00000420854				ENSP00000270142				ENSP00000306968				ENSP00000323183				ENSP00000346478				ENSP00000279227
	ENSP00000304895				ENSP00000276449				ENSP00000312286				ENSP00000325526				ENSP00000347532				ENSP00000284503
	ENSP00000303058				ENSP00000290541				ENSP00000313983				ENSP00000340874				ENSP00000348010				ENSP00000305071
	ENSP00000286800				ENSP00000291565				ENSP00000315410				ENSP00000348043				ENSP00000348933				ENSP00000314556
	ENSP00000362590				ENSP00000295834				ENSP00000316578				ENSP00000353735				ENSP00000351159				ENSP00000326804
	ENSP00000381425				ENSP00000295897				ENSP00000319169				ENSP00000356134				ENSP00000357175				ENSP00000329357
	ENSP00000253055				ENSP00000299518				ENSP00000322915				ENSP00000358770				ENSP00000361264				ENSP00000343706
	ENSP00000357922				ENSP00000301455				ENSP00000327025				ENSP00000360998				ENSP00000361285				ENSP00000347464
	ENSP00000160373				ENSP00000315925				ENSP00000329735				ENSP00000361433				ENSP00000365220				ENSP00000350934
	ENSP00000360286				ENSP00000321259				ENSP00000330523				ENSP00000364475				ENSP00000366271				ENSP00000351740
	ENSP00000384273				ENSP00000325527				ENSP00000332716				ENSP00000369979				ENSP00000369411				ENSP00000363516
	ENSP00000352408				ENSP00000331897				ENSP00000337998				ENSP00000374219				ENSP00000370695				ENSP00000363603
	ENSP00000350094				ENSP00000335203				ENSP00000338352				ENSP00000374443				ENSP00000376071				ENSP00000370337
	ENSP00000265983				ENSP00000341117				ENSP00000343463				ENSP00000377547				ENSP00000376436				ENSP00000380271
	ENSP00000349244				ENSP00000352272				ENSP00000351422				ENSP00000381970				ENSP00000377148				ENSP00000383986
	ENSP00000304891				ENSP00000356425				ENSP00000352841				ENSP00000386076				ENSP00000378405				ENSP00000386636
	ENSP00000393183				ENSP00000357066				ENSP00000354911				ENSP00000389934				ENSP00000384222				ENSP00000390849
	ENSP00000263056				ENSP00000359976				ENSP00000360107				ENSP00000398350				ENSP00000387365				ENSP00000395738
	ENSP00000406012				ENSP00000360290				ENSP00000360464				ENSP00000399718				ENSP00000391596				ENSP00000408295
	ENSP00000290216				ENSP00000366244				ENSP00000362590				ENSP00000404676				ENSP00000401191				ENSP00000411012
	ENSP00000398688				ENSP00000377303				ENSP00000369895				ENSP00000416658				ENSP00000414558				ENSP00000450436
	ENSP00000287295				ENSP00000414303				ENSP00000372361				ENSP00000438590				ENSP00000419665				ENSP00000452762
	ENSP00000238561				ENSP00000419027				ENSP00000376204				ENSP00000275732				ENSP00000451211				ENSP00000470298
	ENSP00000258091				ENSP00000430269				ENSP00000378735				ENSP00000433457				ENSP00000452181				ENSP00000479919
	ENSP00000394405				ENSP00000463999				ENSP00000425133				ENSP00000216923				ENSP00000476145				ENSP00000489189
